# Supplementary material
Source: publisher figshare collection journal article supplement (https://karger.figshare.com/ndownloader/files/13051082)

## SUPPLEMENTARY MATERIAL

# **Exploration of Hepatoprotective Effect of Gentiopicroside on Alpha- Naphthylisothiocyanate-Induced Cholestatic Liver Injury in Rats by Comprehensive Proteomic and Metabolomic Signatures**

Han Han<sup>a,b,c</sup>   Lili Xu<sup>b</sup>   Kai Xiong<sup>c</sup>   Tong Zhang<sup>a,c</sup>   Zhengtao Wang<sup>b</sup>

<sup>a</sup>Experiment Center for Teaching and Learning, Shanghai University of Traditional Chinese Medicine, Shanghai,

<sup>b</sup>Institute of Chinese Materia Medica, Shanghai University of Traditional Chinese Medicine, Shanghai, <sup>c</sup>School of  
Pharmacy, Shanghai University of Traditional Chinese Medicine, Shanghai, China

**Supplementary Figure 1.** Integrated network analysis of the differentially expressed metabolites and proteins by IPA. (A) ANIT/control; (B) GPS/ANIT; and (C) UDCA/ANIT. Metabolites and proteins are represented as nodes, and the biological relationship between two nodes is represented as a line. Solid lines between molecules show a direct physical relationship between molecules, while dotted lines show indirect functional relation. Red symbols represent up-regulated; green symbols represent down-regulated; while the CP symbols represent canonical pathways that are related to the identified proteins and metabolites.

**A, ANIT/Control**

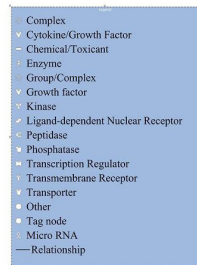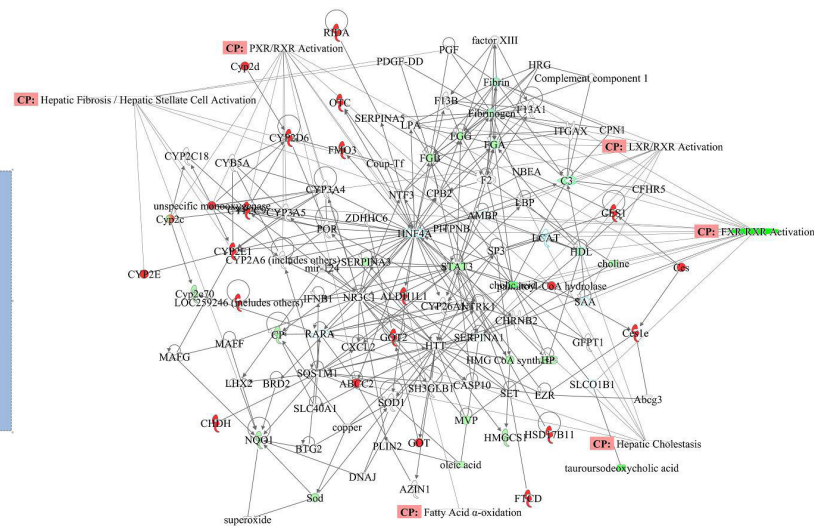

### Path Designer Network 1

**C, UDCA/ANIT**

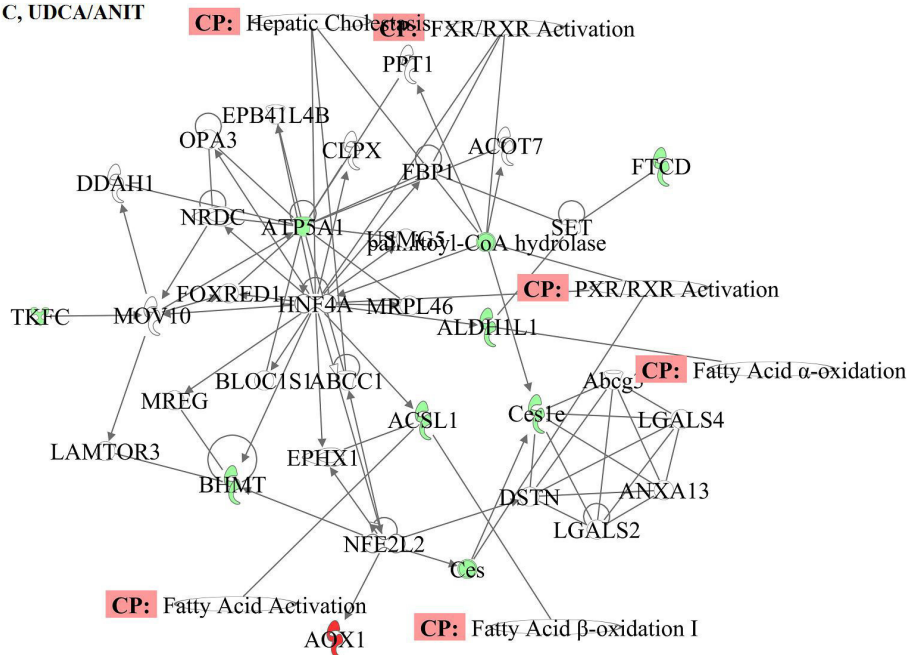

## B, GPS/ANIT

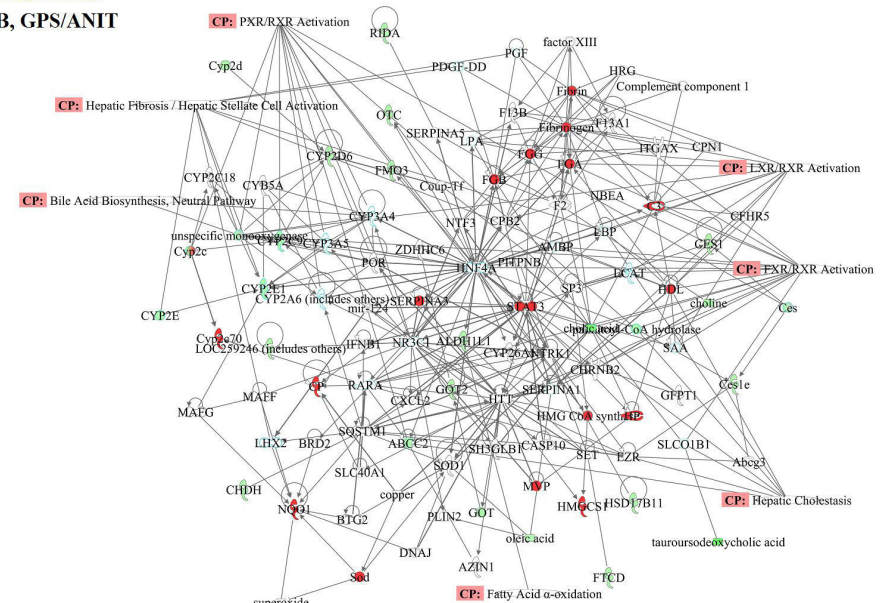

Supplement: Supplementary file 1 [file 13051082]
